# Supplementary material for: Loss of chymotrypsin-like protease (CTRL) alters intrapancreatic protease activation but not pancreatitis severity in mice
Source: PubMed Central journal article supplement (PMC7366634; doi:10.1038/s41598-020-68616-9), 2020-07-16

## **SUPPLEMENTARY MATERIAL**

### **Loss of chymotrypsin-like protease (CTRL) alters intrapancreatic protease activation but not pancreatitis severity in mice**

Dóra Mosztbacher<sup>1</sup>, Zsanett Jancsó<sup>1,2</sup>, Miklós Sahin-Tóth<sup>1,2\*</sup>

<sup>1</sup>Center for Exocrine Disorders, Department of Molecular and Cell Biology, Boston University, Henry M. Goldman School of Dental Medicine, Boston, Massachusetts 02118 and <sup>2</sup>Department of Surgery, University of California Los Angeles, Los Angeles, California 90095

**Supplementary Figure 1.** Genomic sequence of mouse *Ctrl* (NC\_000074.6). Exons are highlighted in yellow and the translation start and stop codons are in green. The 5' and 3' splice sites are italicized and underlined. The polyadenylation signal sequence in the 3' region is underlined and emboldened. The position of the primers used for genotyping are underlined and shown in bold typeface. The 43 bp deletion (c.159\_201del43) in exon 3 of the *Ctrl-KO* mice is indicated in blue.

Genotyping primers:

**mCtrl-F:** 5'-GAA GGC ATT AGG GAG AGG TAG ACT GG-3'

**mCtrl-R:** 5'-GGT TCA GCA TTG GAA GAT CGG TC-3'

PCR product sizes: C57BL/6N 463 bp, *Ctrl-KO* 420 bp

GACCATCTCAACACCATTCCCTTATTTGTCA**ATGCTACTGCTCAGCCTAACCCCTTAGCCTGGTCCCTTGGCTCC**  
**TCCTGGG**GTAAAGTGGGCTGGGAACCGACCTTGGCTGTT**CAGGGGCCAGACAAGGAGCCAGCCTGATGAGAAGGGAA**  
CGGACAGTGTAA**GCAAAAGGAAGGAACCTT**CAGGGCTGAGAGTAAGGGAAGAGCCAGGGACCGGTCTCACAAATGAG  
GCGGGAGCTT**GAGCCAGACCTAAGGAGGCTCAGGAACATATAAGAGATGTGTATAGACTAACAAAGCCTTCTAGCTG**  
CATGGTAGACTGTGCAGGCCTAGAAAAACAGAGGGCAGGGAGATGATAGCAGGAATTAGAGAGAAA**ACTGGCCCAAG**  
GTACATTAGGACTAGGTTGGTAGCTGTGAAAGCATGCACAGGACTTGAAGGCTGGTAGGGTGGGGTA**ACCAAGATAG**  
CTGTGTATGCCTAAAAGGCACTCAAGGGAAGGCCTTGGAGTAATTCTCTTGGACCTCCTCCTGGATCTACAGCCTGG  
GGGCACCTTGA**GAAGGCATTAGGGAGAGGTAGACTGG**GATTGGATTCTCACCAGCCCTATCTATGTT**CAGGCTGTG**  
**GTGTTCCCTGCCATCACGCCTGCACTGAGCTACAATCAGAGAATTGTCAACGGGGAGAATGCAGTGCCAGGCTCCCTGG**  
**CCCTGGCAGGTGTCTCTCCAG**GTAAATGCACCCTATGGGTGGGTTGGGGTCCCTGGGTGCTTTAGGCTATGGGTAACTT  
AAGCCCATT**CATGTATCTAACTTTTGACCCTAG**GA**TAACACCGGCTTCCACTTCTGCGGTGGTTCTCTCATCAGTCC**  
**GA**ACTGGGTGGT**CACGGCTGCCCACTGCCAAGTCA**CGTGAGTGTATCCCCCTCCCTTGGATGCCCGCTCTGAAACCA  
CTTAGCAGCTGCCATTCCATTATCCTTGCAGGCCTGGACGCCACTTTGT**CGTTTTGGGAGAATATGACCGATCTT**  
**CCAATGCTGAACCTGTGCAGGTCCCTCTCGATCGCAAGG**GTAAAGTACTAGCTGTGCATGTAGAAAAGGGAAAATGGACT  
GCAGGGCATCCAGGCATGCCCTGACCTACCCGCCTCAGCACAGGCCTGGGCACCTGTGCCACTCCAGCTTTACATG  
ACTACTGACTGGCTCCAC**AGGCCATCACACACCCTAACTGGAACGCCAACACCATGAACAATGACCTGACTCTCCTG**  
**AAGCTTGCCTCGCCAGCCCGGTACACAGCACAAGTCTCACCAGTCTGCCTGGCTTCCACAAACGAGGCACTGCCTTC**  
**GGGGCTCACCTGTGTACC**ACTGGCTGGGGCCGAATCAGTGGTGTGGG**TAAGA**ACCTGGGTAATGAGGGGAGACCAG  
AAGAGCACCATGGGCCAGCCTAACCACTCTCCTGGCCCA**CAGGCAATGTGACACCAGCTCGCCTGCAGCAAGTTGT**  
TCTACCCCTGGTCACTGTGAATCAGTGT**CGGCAGTACTGGGGTGCACGCATTACCGATGCCATGATATGTGCAGGTG**  
**GCTCAGGCGCCTCCTCATGT**CAGGTAAAGCACCCTGTCTCCGCACTGTCCAGTGGGACACGTCCCCAAACTGCCATG  
CTGACTTCTCCCCTTTTCTTCCCTTT**CAGGGT**GACTCAGGAGGCCCTCTTGTCTGCCAGAAGGGAAACACCTGGGTG  
CTTATTGGGATTGTCTCCTGGGGCACTAAGAACTGCAACATA**CAAGCACCGGCCATGTACACTCGGGT**CAGCAAGTT  
**CAGTACCTGGATCAACCAAGTCATGGCCTACAAC**TAAACTGTCCACAGATCCGTTCCCCATCTCAATCT**AATAAA**CA  
TACTCGTCTCAGTTTCTCTTG

**Supplementary Figure 2.** Messenger RNA sequence of *Ctrl* from C57BL/6N mice (NM\_023182.2) and predicted mRNA sequence of *Ctrl* from *Ctrl-KO* mice. Amino-acid translations are also shown. The translation start and stop codons are indicated in green with underlined, bold typeface. The positions of primers used to amplify *Ctrl* cDNA are underlined and emboldened.

Primers used for cDNA amplification:

**Ctrl cDNA F:** 5'-GTC ACA ATG CTA CTG CTC AGC-3'

**Ctrl cDNA R:** 5'-GGA ACG GAT CTG TGG ACA G-3'

PCR product size: C57BL/6N mice, 821 bp

**Mouse Ctrl mRNA**

GACCATCTCAACACCATTCCCTTATTT**GTCACAATGCTACTGCTCAGC**CTAACCCCTTAGCCTGGTCTCCTTGGCTCC  
TCCTGGGGCTGTGGTGTTCCTGCCATCACGCCTGCACTGAGCTACAATCAGAGAATTGTCAACGGGGAGAATGCAGT  
GCCAGGCTCCTGGCCCTGGCAGGTGTCTCTCCAGGATAACACCGGCTTCCACTTCTGCGGTGGTTCTCTCATCAGTC  
CGAACTGGGTGGTCACGGCTGCCACTGCCAAGTCACGCCTGGACGCCACTTTGTCTGTTTTGGGAGAATATGACCGA  
TCTTCCAATGCTGAACCTGTGCAGGTCTCTCGATCGCAAGGGCCATCACACACCCTAACTGGAACGCCAACACCAT  
GAACAATGACCTGACTCTCCTGAAGCTTGCCTCGCCAGCCCGGTACACAGCACAAGTCTCACCAGTCTGCCTGGCTT  
CCACAAACGAGGCACTGCCTTCGGGGCTCACCTGTGTCACTGGCTGGGGCCGAATCAGTGGTGTGGGCAATGTG  
ACACCAGCTCGCCTGCAGCAAGTTGTTCTACCCCTGGTCACTGTGAATCAGTGTGCGGCAGTACTGGGGTGCACGCAT  
TACCGATGCCATGATATGTGCAGGTGGCTCAGGCGCCTCCTCATGTGAGGGTACTCAGGAGGCCCTCTTGTCTGCC  
AGAAGGGAAACACCTGGGTGCTTATTGGGATTGTCTCCTGGGGCACTAAGAAGTCAACATAACAAGCACCGGCCATG  
TACTCTGGGTGAGCAAGTTCAGTACCTGGATCAACCAAGTCATGGCCTACAAC**TAACTGTCCACAGATCCGTTCC**  
CCATCTCAATCT**AATAAA**CATACTCGTCTCAGTTTCTCTTG

**Translation of mouse Ctrl coding DNA**

Blue highlights the secretory signal peptide and yellow indicates the activation peptide.

**MLLLSLTSLVLLGSSWGC****GVPAITPALS****YNQR**IVNGENAVPGSWPQVSLQDNTGFHFCGGLISPNWVVTAAHCQ  
VTPGRHFVVLGEYDRSSNAEPVQVLSIARAITHPNWNANTMNDLTLKLASPARYTAQVSPVCLASTNEALPSGLT  
CVTTGWGRISGVGNVTPARLQVVLPVTVNQCRQYWGARITDAMICAGGSGASSCQDSDGGPLVCQKNTWVLIGI  
VSWGTKNCNIQAPAMYTRVSKFSTWINQVMAYNX

**Predicted mouse Ctrl mRNA with 43 bp deletion (c.159\_201del43)**

GACCATCTCAACACCATTCCCTTATTT**GTCACAATGCTACTGCTCAGC**CTAACCCCTTAGCCTGGTCTCCTTGGCTCC  
TCCTGGGGCTGTGGTGTTCCTGCCATCACGCCTGCACTGAGCTACAATCAGAGAATTGTCAACGGGGAGAATGCAGT  
GCCAGGCTCCTGGCCCTGGCAGGTGTCTCTCCAGGAACTGGGTGGTCACGGCTGCCACTGCCAAGTCACGCCTGG  
ACGCCACTTTGTCTGTTTTGGGAGAATATGACCGATCTTCCAATGCTGAACCTGTGCAGGTCTCTCGATCGCAAGGG  
CCATCACACACCCTAACTGGAACGCCAACACCATGAACAATGACCTGACTCTCCTGAAGCTTGCCTCGCCAGCCCGG  
TACACAGCACAAGTCTCACCAGTCTGCCTGGCTTCCACAAACGAGGCACTGCCTTCGGGGCTCACCTGTGTCAACC  
TGGCTGGGGCCGAATCAGTGGTGTGGGCAATGTGACACCAGCTCGCCTGCAGCAAGTTGTTCTACCCCTGGTCACTG  
TGAATCAGTGTGCGCAGTACTGGGGTGCACGCATTACCGATGCCATGATATGTGCAGGTGGCTCAGGCGCCTCCTCA  
TGTCAGGGTGACTCAGGAGGCCCTCTTGTCTGCCAGAAGGGAAACACCTGGGTGCTTATTGGGATTGTCTCCTGGGG  
CACTAAGAAGTCAACATAACAAGCACCGGCCATGTACTCTGGGTGAGCAAGTTCAGTACCTGGATCAACCAAGTCA  
TGGCCTACAAC**TAACTGTCCACAGATCCGTTCC**CCATCTCAATCT**AATAAA**CATACTCGTCTCAGTTTCTCTTG

**Translation of predicted mouse Ctrl coding DNA with deletion (p.D53EfsX52)**

Blue highlights the secretory signal peptide and yellow indicates the activation peptide. The frame-shifted sequence is shown in gray.

**MLLLSLTSLVLLGSSWGC****GVPAITPALS****YNQR**IVNGENAVPGSWPQVSLQ**ETGWSRLPTAKSRLD****ATLSFWENMT**  
**DL****PMLNLCRSSRSQGPSHTLTGTPTPX**

**Supplementary Figure 3.** Uncropped version of gels shown in Figure 1.

Figure 1 C and E

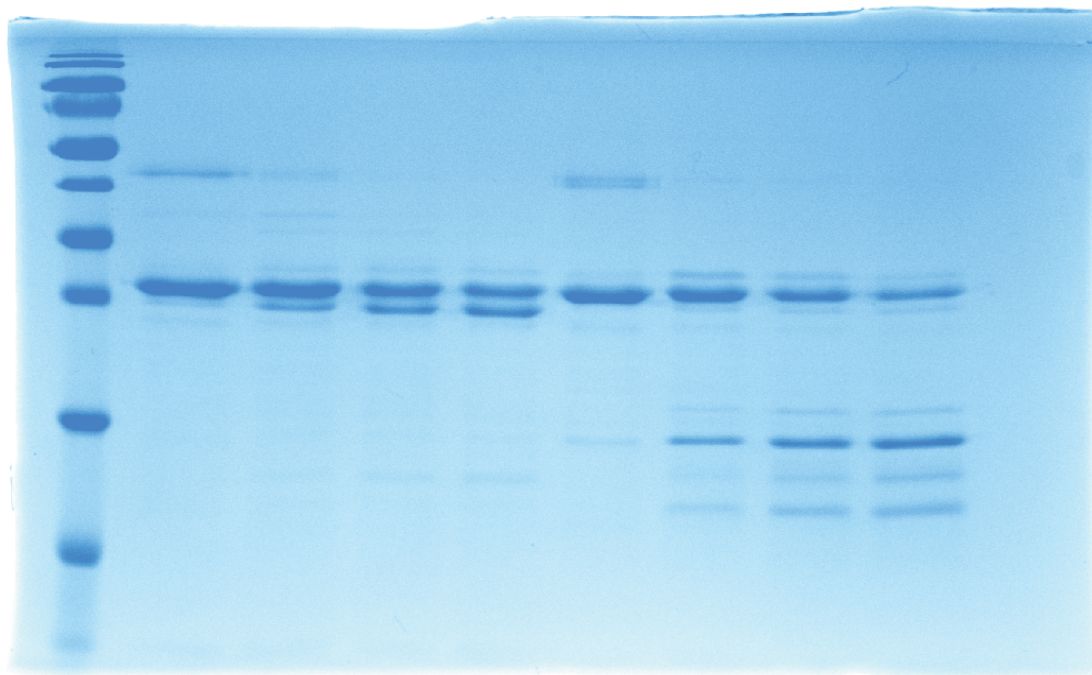

Figure 1 D and F

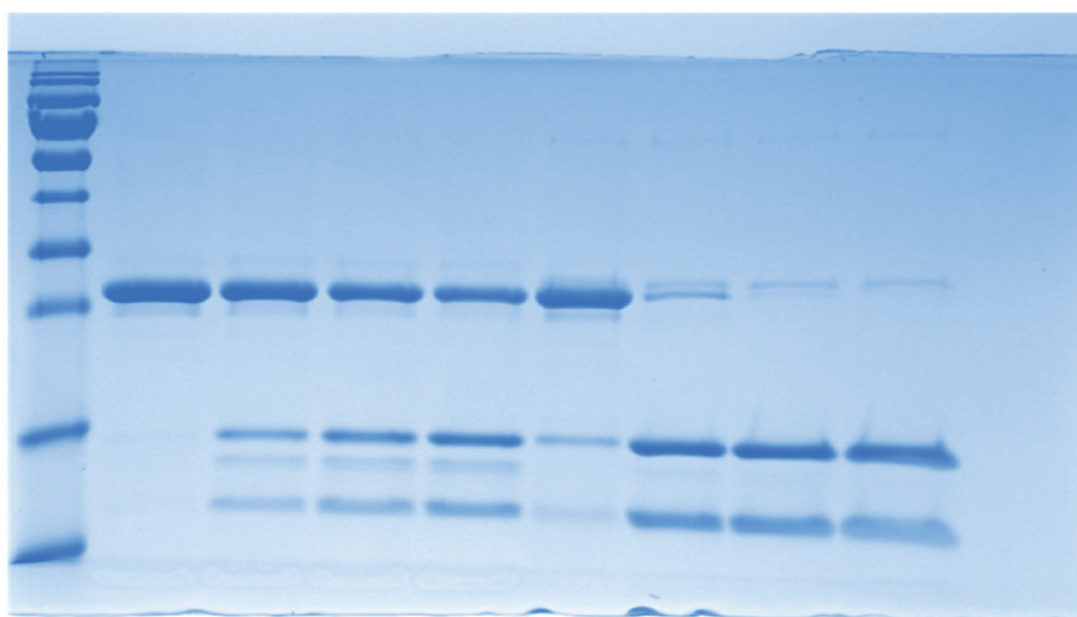

**Supplementary Figure 4.** Uncropped version of agarose gel shown in Figure 2C.

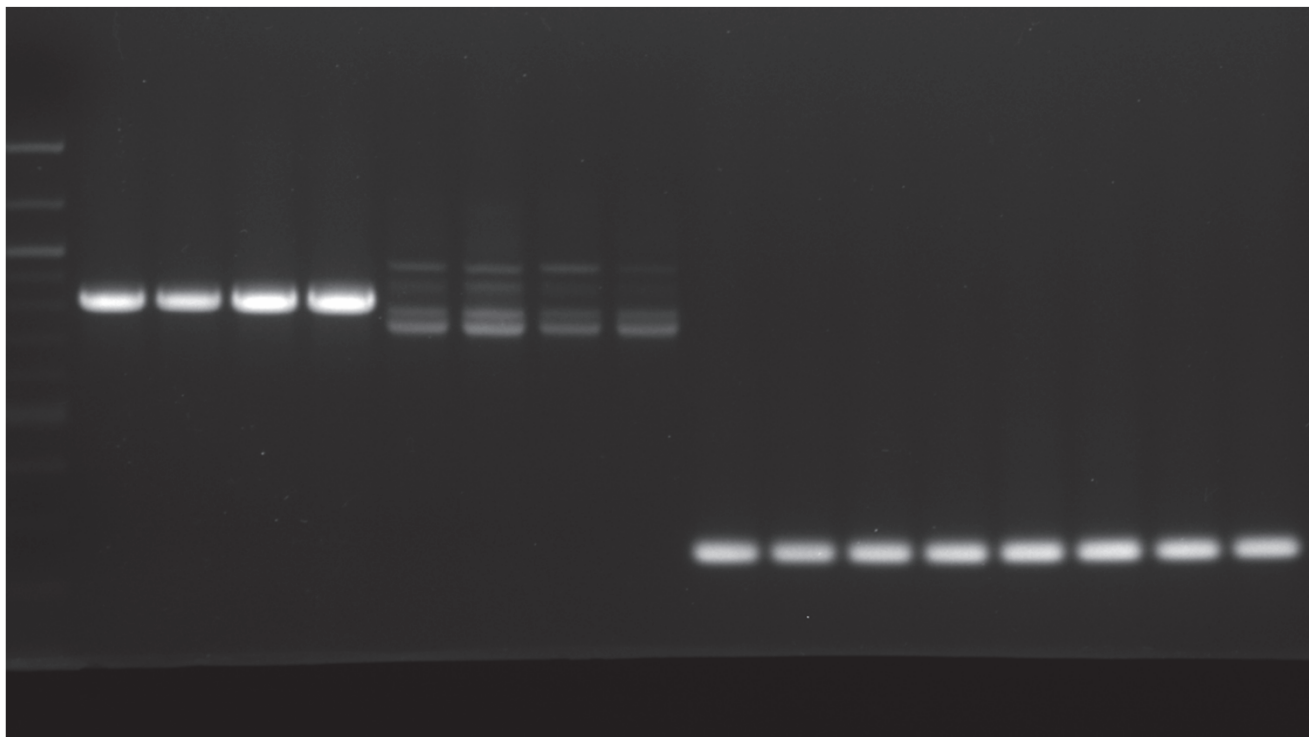

Supplementary Figure 5. Uncropped version of western blots shown in Figure 2D.

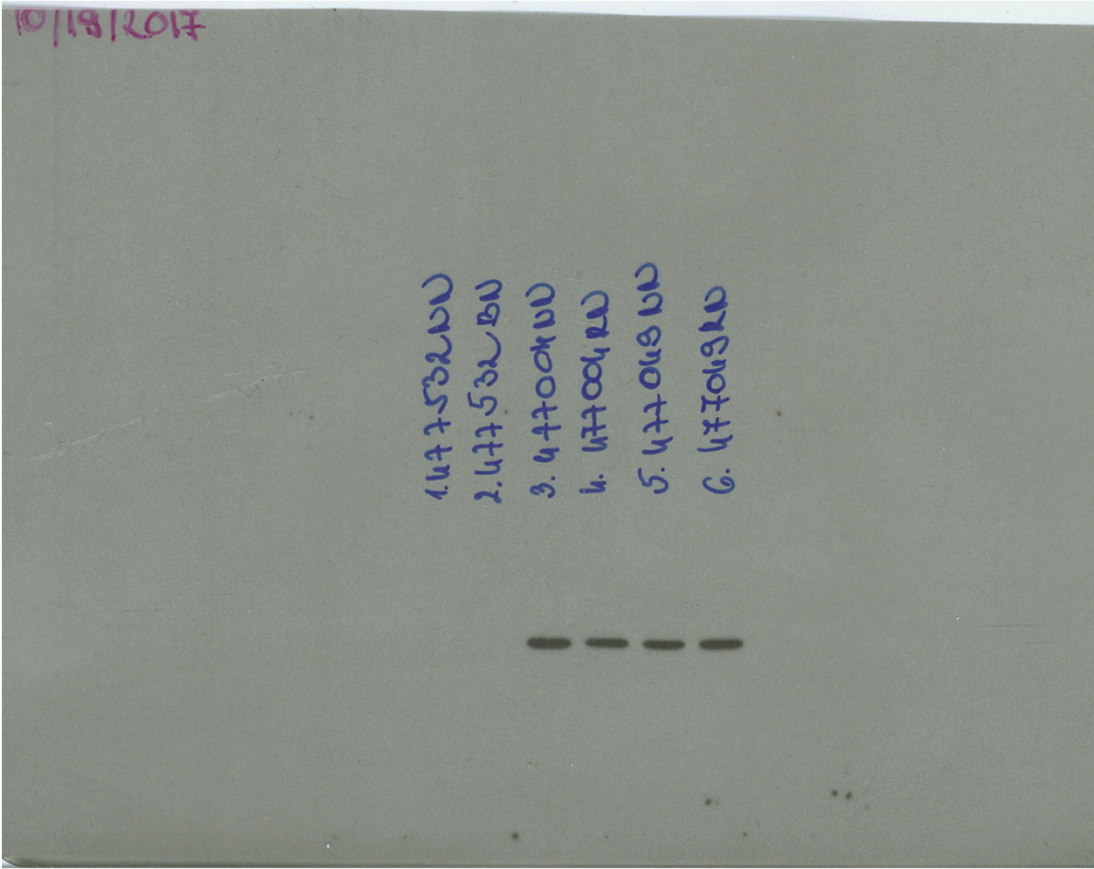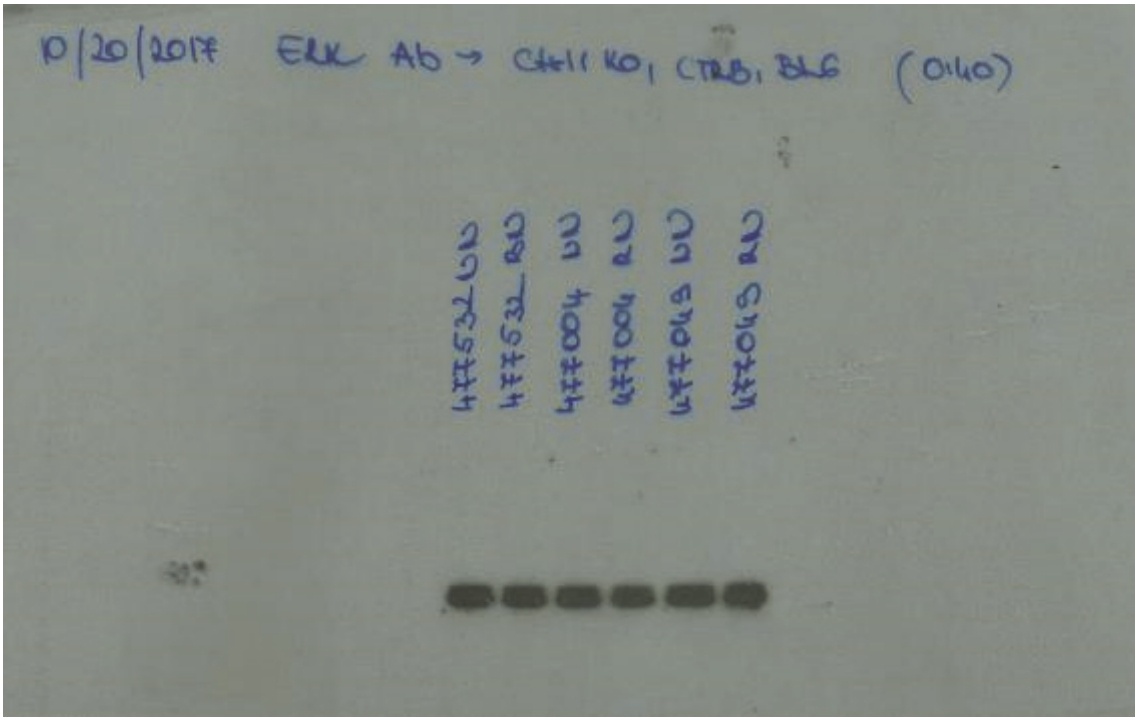

Supplement: 41598_2020_68616_MOESM1_ESM.pdf [file 41598_2020_68616_MOESM1_ESM.pdf]
